# Supplementary material for: Genome concentration limits cell growth and modulates proteome composition in Escherichia coli
Source: eLife. 2024 Dec 23;13:RP97465. doi: 10.7554/eLife.97465 (PMC11666246; doi:10.7554/eLife.97465)
Supplement: Supplementary file 12. [file elife-97465-supp12.docx]

**Appendix 3 – Supplementary File 1**

| Model A | Model B |
| --- | --- |
|  | ,  , |
